## **Self-reported sleep duration and daytime napping are associated with renal hyperfiltration and microalbuminuria in apparently healthy Chinese population.**

Yingnan YE<sup>1,2</sup>, Linxi ZHANG<sup>1</sup>, Wenhua YAN<sup>1</sup>, Anping WANG<sup>1</sup>, Weiqing WANG<sup>3</sup>, Zhengnan GAO<sup>4</sup>, Xulei TANG<sup>5</sup>, Li YAN<sup>6</sup>, Qin WAN<sup>7</sup>, Zuojie LUO<sup>8</sup>, Guijun QIN<sup>9</sup>, Lulu CHEN<sup>10</sup>, Shiqing WANG<sup>1,2</sup>, Yuxia Wang<sup>1,2</sup>, Yiming MU<sup>1,2</sup>.

The work was carried out at Chinese PLA General Hospital, Beijing, China.

### Author Affiliations

1. Chinese PLA General Hospital, Beijing, China.
2. Department of Medicine, Nankai University, Tianjin, China.
3. Shanghai jiaotong University Affiliated Ruijin Hospital, ShangHai, China.
4. Center Hospital of Dalian, Dalian, Liaoning, China.
5. Lanzhou University first Hospital, Lanzhou, Gansu, China.
6. Zhongshan University Sun yat-sen memorial Hospital, Guangzhou, Guangdong, China
7. Southwest Medical University Affiliated Hospital, Luzhou, Sichuan, China.
8. Guangxi Medical University first affiliated Hospital, Nanning, Guangxi, China.
9. Zhengzhou University first affiliated Hospital, Zhengzhou, Henan, China.
10. Wuhan Union Hospital, Wuhan, Hubei, China.

Correspondence: Yiming Mu MD, PhD, Department of Endocrinology, Chinese PLA General Hospital.

Postal address: Chinese PLA General Hospital, Beijing 100853, China.

Phone: 86-13910580089.

Fax: 010-66939841.

E-mail: [muyiming@301hospital.com.cn](mailto:muyiming@301hospital.com.cn).

The word count of the manuscript and abstract are 3404 and 247.

**Keyword:** Sleep duration, daytime napping, albuminuria, hyperfiltration, renal health

1 **Abstract**

2 **Background:** Sleep duration affects health in various way. The objective of this study  
3 was to investigate the relationship between sleep duration, daytime napping and kidney  
4 function in a middle-aged apparently healthy Chinese population.

5 **Methods:** According to self-reported total sleep and daytime napping duration, 33,850  
6 participants aged 38 to 90 years old from 8 regional centers were divided into subgroups.  
7 Height, weight, waistline, hipline, blood pressure, biochemical index, FBG, PBG,  
8 HbA1c, creatinine and urinary albumin-creatinine ratio (UACR) were measured and  
9 recorded in each subject. Microalbuminuria was defined as  $UACR \geq 30$  mg/g, CKD  
10 was defined as  $eGFR < 60$  ml/min and hyperfiltration was defined as  $eGFR \geq 135$   
11 ml/min. Multiple logistic regressions were applied to investigate associations between  
12 sleep and kidney function.

13 **Results:** Compared to participants with [7-8]h/day sleep, ORs of  $>9$  h/day, (8, 9]h/day  
14 and  $<6$ h/day sleep for microalbuminuria were 1.317 (1.200-1.446,  $p < 0.001$ ), 1.215  
15 (1.123-1.315,  $p < 0.001$ ) and 1.218 (0.967-1.534,  $p = 0.094$ ). eGFR levels were U-shaped  
16 associated with sleep duration among subjects with  $\geq 90$ ml/min eGFR, and N-shaped  
17 associated with sleep duration among subjects with  $< 90$ ml/min eGFR. OR of  $>9$ h/day  
18 sleep for hyperfiltration was 1.400 (1.123-1.745,  $p = 0.003$ ) among  $eGFR \geq 90$  ml/min  
19 participants. Daytime napping had a negative effect on renal health. Compared to  
20 participants did not have napping habit, the ORs of (0, 1]h/day, (1, 1.5]h/day and  
21  $>1.5$ h/day daytime napping for microalbuminuria were 1.477 (1.370-1.591,  $p < 0.001$ ),

22 1.217 (1.056, 1.403, p=0.007) and 1.447 (1.242, 1.687, p<0.001).

23 **Conclusions:** Total sleep duration are U-shaped associated with renal health outcomes.

24 Daytime napping had a negative effect on renal health.

## 25 **Introduction**

26 In the past decades, accumulating evidences indicated chronic sleep disorders  
27 represent a risk factor affecting metabolic health. Inappropriate sleep duration had been  
28 proved to be associated with many adverse health outcomes, such as diabetes<sup>1,2</sup>,  
29 obesity<sup>3</sup>, hypertension<sup>4,5</sup>, osteoporosis<sup>6</sup>, cardiovascular disease<sup>7,8</sup>, stroke<sup>9</sup> and total  
30 mortality<sup>10</sup>. Recently, a series of studies suggested extreme sleep duration may  
31 contribute to the decline of kidney function, which is closely tied to the vascular system,  
32 also an important, independent risk factor for cardiovascular disease. Both extremely  
33 short<sup>11,12</sup> and long<sup>13</sup> sleep duration and poor sleep quality<sup>14,26</sup> were reported to be related  
34 to higher urine albumin-to-creatinine ratio(UACR), which is a sensitive indicator for  
35 microalbuminuria or early stage of kidney damage, among US and Japanese population.  
36 In addition, short sleep duration was associated with higher odds of inadequate  
37 hydration<sup>15</sup>. On the other hand, whether the effect of sleep duration on glomerular  
38 filtration rate(GFR) is positive or negative is debatable. Several studies have  
39 demonstrated an increasing risk of CKD<sup>16,17</sup> or lower GFR<sup>12,18,19,20,21</sup> in short  
40 sleepers, but a few studies have shown no correlation between sleep duration and  
41 CKD<sup>22-25</sup>. Conversely, there were both cross-sectional or cohort studies which have  
42 reported inappropriate sleep duration contributes to glomerular hyperfiltration<sup>13,26-28</sup>.

43 This difference in outcomes can be attributed not only to differences in race, age, social  
44 work stress, health and economic status of the participants, but also to the fact that in  
45 the progression of CKD, healthy individuals tend to have glomerular hyperfiltration  
46 initially, followed by increased risk for renal injury, leading to a decrease in filtration  
47 rate and accelerating development of CKD. Such a pathophysiological progression  
48 occurs in the context of type 1 diabetes and hypertension, as well as increasing stages  
49 of pre-diabetes and pre-hypertension<sup>29-31</sup>. Therefore, to provide further evidence of the  
50 contribution of sleep duration in the progression of renal function decline, a multi-  
51 center studies with sufficient participants with diverse health conditions will be required.  
52 Therefore, we conducted this study to determine whether the relationship between  
53 UACR and sleep duration exists among Chinese provinces and cities, and to verify  
54 whether different health conditions have an interactive effect on this relationship.

## 55 **Methods**

56 **Study subjects:** A total of 33,850 participants from 8 regional centers include in the  
57 REACTION (Risk Evaluation of cAncers in Chinese diabeTic Individuals a  
58 LONGitudinal) study, in which are Dalian, Guangzhou, Zhengzhou, Lanzhou, Luzhou,  
59 Wuhan, Guangxi, and Shanghai. Excluded participants with primary kidney diseases,  
60 daily ACEI/ARB medicine use, and those with a fallacious self-reported sleep duration  
61 (<4 h or >12 h).

62 **Questionnaire:** A standardized questionnaire was used to collect basic information  
63 including medical history, physical exercise, and smoking and drinking habits. Self-

64 reported sleep duration and daytime napping time were ascertained by following  
65 questions: (1) how many hours of sleep do you usually get at night, (2) how many  
66 minutes do you usually nap at noon. All investigators were previously trained. In the  
67 analysis, participants were divided into four groups (<6, >=6&<7, >=7&<=8, >8%<=9,  
68 >9 h/d) on the basis of their sleep duration for 7 to 8 hours of sleep is generally  
69 considered as the most appropriate sleep duration.

70 ***Physical examination:*** Height, weight, waistline, and hipline of the subjects were  
71 measured and recorded. Participants were asked to take off shoes, hats and coats before  
72 measurements. Waistline was measured at the horizontal level of the midpoint of the  
73 ligature between anterior superior spine and the inferior margin of the 12th rib. Hipline  
74 was defined as the horizontal length of the most protruding part of hip. All data were  
75 recorded to within one decimal place.

76 ***Urinary albumin-creatinine ratio (UACR) measurement and data processing:*** Urine  
77 samples were collected in the morning for the UACR measurement. According to the  
78 quartile division, among which centre the subjects belonged in the logistic regression,  
79 the UACR data were divided into the under 25% group, the 25%-50% group, the 50%-  
80 75% group, and the over 75% group. Higher UACR level was defined as subjects  
81 belonged to the over 75% group. Microalbuminuria was defined as  $UACR \geq 30$  mg/g.

82 ***Estimated glomerular filtration rate calculation:*** MDRD formula was used to  
83 calculate eGFR.

84  $eGFR = 186 * Scr^{-1.154} * age^{-0.203} * (female * 0.742)$ .

85 CKD was defined as  $eGFR < 60$  ml/min. Hyperfiltration was defined as  $eGFR \geq 135$   
86 ml/min.

87 **Blood pressure measurement:** Blood pressure was measured 3 times with 1 min  
88 intervals after subjects were seated for 5 min. The average of 3 values was used for the  
89 analysis. Hypertension was defined as the average systolic blood pressure  $\geq 140$   
90 mmHg or diastolic blood pressure  $\geq 90$  mmHg, or had a definite medical history of  
91 hypertension.

92 **Blood biochemical index, glucose, HbA1c and insulin measurement:** Blood samples  
93 were drawn in the morning after subjects had fasted 8 hours the previous night.  
94 Participants without a history of diabetes underwent a 75-g oral glucose tolerance test,  
95 while those with diabetes underwent a 100g oral steam bread tolerance test and their  
96 venous blood samples were drawn at 0 and 120 minutes. Biochemical index included  
97 triglycerides (TG), cholesterol (TC), low density lipoprotein (LDL), high density  
98 lipoprotein (HDL), creatinine (Scr), urea nitrogen (BUN), liver function index (ALT,  
99 AST, GGT), fasting blood glucose (FBG), postprandial blood glucose (PBG),  
100 glycosylated haemoglobin (HbA1c), and fasting blood insulin and postprandial blood  
101 insulin, which were measured by glucose oxidase-peroxidase method. Diabetes  
102 mellitus (DM) was defined as  $FBG \geq 7.0$  mmol/L or  $PBG \geq 11.1$  mmol/L, or had a  
103 definite medical history of diabetes. Impaired fasting glucose was defined as  $FBG \geq 6.1$   
104 mmol/L but without DM. Impaired glucose tolerance was defined as  $PBG \geq 7.8$   
105 mmol/L but without DM.

106 **Statistical analysis:** Statistical analysis was performed using SPSS software, version  
107 19.0  
108 (Chicago, IL). All continuous variables with normal distribution are presented as the  
109 mean values and standard deviation (SD). All continuous variables with skewness  
110 distribution are presented as media and 25,75 percentile. All enumeration data  
111 presented as propotion. The differences in the mean values or proportions of the  
112 characteristics of the studied subjects sectional association between sleep duration and  
113 UACR, FPG, PPG, AST, GGT, ALT, HbA1c and TG values, and the latter were  
114 transformed using the natural log in the analyses due to their skewed distribution.

## 115 **Results**

116 A total of 33,850 participants, including 11,198 males and 22,652 females were  
117 included in the analysis. The mean age of the total population was  $58.1 \pm 9.3$  years; self-  
118 reported total sleep duration was  $8.1 \pm 1.2$  h, and daytime napping duration was  $0.3 \pm 0.6$   
119 h; median of UACR was 9.4 mg/g; mean eGFR was  $93.9 \pm 19.1$  ml/min.

120 General characteristics of the participants in this study according to different  
121 categories of total sleep duration are shown in Table 1. Compared with those who slept  
122 7-8 h per day, participants who slept shorter or longer were more likely to be older and  
123 to have higher TG, PBG and UACR value, as well as higher proportion of

Table 1. Baseline information according to self-reported total sleep duration.

| Sleep duration,h       | ALL n=33850     | (0-6) n=651      | [6-7) n=2854    | [7--8] n=16492  | (8--9] n=8902   | >9 n=4951        | P value |
|------------------------|-----------------|------------------|-----------------|-----------------|-----------------|------------------|---------|
| Age, years             | 58.1±9.3        | 58.7±8.8         | 57.7±8.8        | 57.5±8.8        | 58.5±9.6        | 59.8±10.3        | <0.001  |
| Male, %                | 33.1(11198)     | 31.5(205)        | 31.7(904)       | 32.1(5291)      | 33.7(2997)      | 36.4(1801)       | <0.001  |
| Waist circumference,cm | 86.2±10.0       | 87.6±11.2        | 86.4±10.1       | 86.0±9.9        | 86.3±10.0       | 86.4±10.2        | <0.001  |
| Hip circumference,cm   | 97.0±7.8        | 97.7±8.6         | 97.3±7.7        | 97.0±7.8        | 97.0±7.8        | 96.6±7.9         | <0.001  |
| BMI, kg/m2             | 24.7±3.7        | 25.1±4.3         | 24.9±3.6        | 24.7±3.7        | 24.6±3.6        | 24.5±3.7         | <0.001  |
| Tumor,%                | 3.0(992)        | 3.7(24)          | 3.3(93)         | 2.9(485)        | 2.8(252)        | 2.8(138)         | 0.515   |
| Diabetes,%             | 22.8(7712)      | 24.7(161)        | 21.8(622)       | 21.0(3461)      | 23.4(2082)      | 28.0(1386)       | <0.001  |
| Smoking habits         |                 |                  |                 |                 |                 |                  | <0.001  |
| Regular smoker,%       | 12.6(4219)      | 13.2(85)         | 13.2(372)       | 12.1(1983)      | 12.2(1075)      | 14.3(704)        |         |
| Sometimes smoker,%     | 2.6(878)        | 1.4(9)           | 2.4(68)         | 2.5(407)        | 2.9(257)        | 2.8(137)         |         |
| Never smoker,%         | 84.8(28470)     | 85.4(551)        | 83.5(2384)      | 85.4(13975)     | 84.9(7493)      | 82.9(4067)       |         |
| Drinking habits        |                 |                  |                 |                 |                 |                  | <0.001  |
| Regular drinker,%      | 7.0(2349)       | 9.6(62)          | 7.7(219)        | 6.6(1080)       | 7.1(626)        | 7.4(362)         |         |
| Sometimes drinker,%    | 19.1(6406)      | 17.0(110)        | 19.8(560)       | 19.9(3262)      | 17.9(1580)      | 18.2(894)        |         |
| Never drinker,%        | 73.9(24827)     | 73.4(475)        | 72.4(2048)      | 73.5(12034)     | 75.0(6620)      | 74.4(3650)       |         |
| Regular exercise,%     | 12.1(4097)      | 14.0(91)         | 12.9(368)       | 12.9(2133)      | 11.3(1008)      | 9.9(497)         | <0.001  |
| Exercise intensity     |                 |                  |                 |                 |                 |                  | <0.001  |
| Mild exercise,%        | 9.1(3081)       | 9.8(64)          | 9.7(278)        | 10.2(1675)      | 8.4(750)        | 6.3(314)         |         |
| Moderate exercise,%    | 2.6(875)        | 3.4(22)          | 2.8(80)         | 2.4(403)        | 2.5(224)        | 2.9(146)         |         |
| Severe exercise,%      | 0.4(141)        | 0.8(5)           | 0.4(10)         | 0.3(55)         | 0.4(34)         | 0.7(37)          |         |
| Obesity(BMI>=28),%     | 15.1(5127)      | 18.9(123)        | 17.4(2854)      | 15.2(2510)      | 14.5(1293)      | 14.2(703)        | <0.001  |
| HbA1c,%                | 5.9(5.6,6.2)    | 5.9(5.6,6.3)     | 5.9(5.6,6.2)    | 5.9(5.6,6.2)    | 5.9(5.6,6.3)    | 5.9(5.6,6.4)     | <0.001  |
| SBP,mmHg               | 131.8±20.4      | 132.5±22.0       | 132.1±20.2      | 131.9±20.3      | 131.6±20.4      | 131.9±20.8       | 0.695   |
| DBP,mmHg               | 77.6±10.9       | 77.4±11.1        | 77.6±11.0       | 77.6±10.9       | 77.5±10.8       | 77.6±10.9        | 0.795   |
| Hypertension,%         | 40.5(13708)     | 43.6(284)        | 39.7(1133)      | 39.6(6523)      | 40.9(3643)      | 42.9(2125)       | <0.001  |
| Menopause(Female),%    | 74.3(14270)     | 79.3(280)        | 74.5(1178)      | 88.4(14580)     | 74.7(3830)      | 75.8(2100)       | 0.019   |
| CreaC,mmol/L           | 65.8(59.5,73.7) | 65.3(59.1,72.6)  | 65.2(59.1,73.2) | 65.4(59.3,73.1) | 65.9(59.5,74.2) | 67.0(60.3,75.8)  | <0.001  |
| Triglycerides,mmol/L   | 1.36(0.97,1.97) | 1.36(0.98,1.96)  | 1.32(0.92,1.92) | 1.32(0.95,1.92) | 1.41(1.00,2.02) | 1.44(1.02,2.07)  | <0.001  |
| Cholesterol,mmol/L     | 5.07±1.13       | 5.16±1.14        | 5.13±1.12       | 5.12±1.13       | 5.01±1.13       | 4.95±1.13        | <0.001  |
| HDL,mmol/L             | 1.32±0.34       | 1.33±0.37        | 1.34±0.34       | 1.33±0.34       | 1.30±0.33       | 1.28±0.34        | <0.001  |
| LDL,mmol/L             | 2.98±0.90       | 3.03±0.91        | 3.04±0.89       | 3.02±0.89       | 2.94±0.90       | 2.88±0.89        | <0.001  |
| GGT,mmol/L             | 21.0(15.0,32.0) | 22.0(16.0,33.0)  | 21.0(15.0,32.0) | 21.0(15.0,32.0) | 21.0(15.0,33.0) | 21.0(15.0,33.0)  | 0.4     |
| AST,mmol/L             | 20.0(17.0,25.0) | 20.0(17.0,25.0)  | 20.0(17.0,25.0) | 20.0(17.0,25.0) | 20.0(17.0,25.0) | 20.0(17.0,25.0)  | 0.921   |
| ALT,mmol/L             | 15.0(11.0,21.0) | 15.0(11.0,21.0)  | 15.0(11.0,21.0) | 15.0(11.0,21.0) | 15.0(11.0,21.0) | 15.0(11.0,21.0)  | 0.234   |
| FBG,mmol/L             | 5.55(5.12,6.19) | 5.58(5.14,6.30)  | 5.56(5.12,6.17) | 5.53(5.12,6.11) | 5.55(5.12,6.20) | 5.60(5.14,6.36)  | <0.001  |
| PBG,mmol/L             | 7.40(6.01,9.73) | 7.54(6.10,10.10) | 7.35(5.91,9.62) | 7.26(5.97,9.47) | 7.48(6.08,9.82) | 7.79(6.19,10.56) | <0.001  |
| Daytimenapping,%       | 33.7(11393)     | 10.6(69)         | 12.5(358)       | 18.9(3117)      | 48.4(4307)      | 71.5(3542)       | <0.001  |
| Microalbuminuria,%     | 13.3(4512)      | 14.9(554)        | 12.6(360)       | 11.6(1912)      | 14.6(1303)      | 17.0(840)        | <0.001  |
| High UACR level,%      | 24.7(8357)      | 26.7(174)        | 26.0(741)       | 23.8(3920)      | 24.6(2189)      | 26.9(1333)       | <0.001  |
| CKD,%                  | 2.5(832)        | 2.6(17)          | 2.0(56)         | 2.1(354)        | 2.5(226)        | 3.6(179)         | <0.001  |
| Hyperfiltration,%      | 2.5(860)        | 2.8(18)          | 2.3(65)         | 2.2(363)        | 2.8(250)        | 3.3(164)         | <0.001  |
| UACR,mg/g              | 9.4(5.4,18.9)   | 9.3(5.4,19.0)    | 8.9(5.3,16.9)   | 8.7(5.1,17.0)   | 10.5(5.8,20.9)  | 11.5(6.3,22.8)   | <0.001  |
| eGFR(ml/(min*1.73m2)   | 93.9±19.1       | 94.4±19.7        | 94.3±18.6       | 94.2±18.4       | 93.9±19.5       | 92.9±20.6        | <0.001  |

Chi-squared tests for discrete variables and one-way ANOVA for continuous variables

All continuous variables with normal distribution are presented as the mean values and standard deviation (SD). All continuous variables with skewness distribution are presented as media and 25,75 percentile. All enumeration data presented as proportion.

UACR>=30 mg/g, CKD was defined as eGFR<60 ml/min and hyperfiltration was defined as eGFR>=135 ml/min.

Microalbuminuria was defined as According to the quartile division, among which the subjects belonged, the UACR data were divided into the under 25% group, the 25%-50% group, the 50%-75% group, and the over 75% group. Higher UACR level was defined as subjects belonged to the over 75% group.



diabetes, hypertension, hyperfiltration, microalbuminuria and high UACR level.

Those with sleep duration longer than 9 h were more likely to be obesity and to have lower eGFR level and less physic exercise, however, their CHOL and LDL levels were lower compared to the reference. Reverse results were observed in the short sleep duration groups. Furthermore, no significant difference in blood pressure was observed across all sleep categories. Although there were statistical differences in drinking and smoking habits across the groups, no significant increase or decrease or U-shaped relationship between sleep duration and drinking or smoking was observed.

Table 2 summarizes the participants' characteristics by daytime napping. Napping habit was reported by 7,001 of 11,198 men (62.5%) and 15,456 of 22,652 women (68.2%). Those who took naps seem to more likely to be women, which is converse to previous study<sup>27</sup>. Individuals who took naps were more likely to be regular drinkers, smokers and to have less physic exercise, naturally, they also have higher BMI and TG values and were more likely to have metabolic disease like obesity, hypertension, especially diabetes. Interestingly, napping seems to be a protective factor for hypercholesterolemia for the negative association between nap duration and CHOL, HDL. This result is consistent to the relationship between total sleep duration and CHOL, HDL. Nap habit also contributes to the kidney function decline. Participants took naps had higher prevalence of microalbuminuria, CKD and hyperfiltration, and their UACR values were significant higher.

We further focus on the association between sleep duration and several health outcomes, including microalbuminuria, high UACR level, CKD, hyperfiltration,

Table 2. Baseline information according to daytime napping.

| daytime napping,h      | ALL n=33850     | 0 n=22457       | (0, 1] n=8240    | (1, 1.5] n=1817  | >1.5 n=1336      | P value |                                                                                                                                                                                                                                                                            |
|------------------------|-----------------|-----------------|------------------|------------------|------------------|---------|----------------------------------------------------------------------------------------------------------------------------------------------------------------------------------------------------------------------------------------------------------------------------|
| Age, years             | 58.1±9.3        | 57.3±8.9        | 59.8±9.7         | 59.7±9.6         | 59.5±9.8         | <0.001  |                                                                                                                                                                                                                                                                            |
| Male, %                | 33.1(11198)     | 31.2(7001)      | 35.9(2960)       | 41.8(759)        | 35.8(478)        | <0.001  |                                                                                                                                                                                                                                                                            |
| Waist circumference,cm | 86.2±10.0       | 86.2±10.1       | 86.0±9.8         | 86.7±10.1        | 87.3±10.4        | <0.001  |                                                                                                                                                                                                                                                                            |
| Hip circumference,cm   | 97.0±7.8        | 97.0±7.9        | 96.8±7.6         | 97.2±7.8         | 97.4±7.8         | 0.042   |                                                                                                                                                                                                                                                                            |
| BMI, kg/m2             | 24.7±3.7        | 24.7±3.7        | 24.4±3.6         | 24.8±3.8         | 25.1±3.8         | <0.001  |                                                                                                                                                                                                                                                                            |
| Tumor,%                | 3.0(992)        | 3.1(698)        | 2.6(212)         | 3.2(58)          | 1.8(24)          | 0.004   |                                                                                                                                                                                                                                                                            |
| Diabetes,%             | 22.8(7712)      | 20.7(4657)      | 25.3(2084)       | 29.8(541)        | 32.2(430)        | <0.001  | Chi-squared tests for discrete variables and one-way ANOVA for continuous variables                                                                                                                                                                                        |
| Smoking habits         |                 |                 |                  |                  |                  | <0.001  |                                                                                                                                                                                                                                                                            |
| Regular smoker,%       | 12.6(4219)      | 12.3(2745)      | 12.1(996)        | 16.3(291)        | 14.2(187)        |         |                                                                                                                                                                                                                                                                            |
| Sometimes smoker,%     | 2.6(878)        | 2.5(553)        | 2.9(236)         | 2.9(52)          | 2.8(37)          |         | All continuous variables with normal distribution are presented as the mean values and standard deviation (SD). All continuous variables with skewness distribution are presented as media and 25,75 percentile. All enumeration data presented as proportion.             |
| Never smoker,%         | 84.8(28470)     | 85.2(18961)     | 85.0(6969)       | 80.8(1443)       | 83.0(1097)       | <0.001  |                                                                                                                                                                                                                                                                            |
| Drinking habits        |                 |                 |                  |                  |                  | <0.001  |                                                                                                                                                                                                                                                                            |
| Regular drinker,%      | 7.0(2349)       | 6.8(1507)       | 6.8(559)         | 9.8(175)         | 8.1(108)         |         |                                                                                                                                                                                                                                                                            |
| Sometimes drinker,%    | 19.1(6406)      | 19.1(4242)      | 18.9(1554)       | 20.3(363)        | 18.6(247)        |         |                                                                                                                                                                                                                                                                            |
| Never drinker,%        | 73.9(24827)     | 73.5(16512)     | 74.3(6095)       | 69.9(1247)       | 73.3(973)        | <0.001  |                                                                                                                                                                                                                                                                            |
| Regular exercise,%     | 12.1(4097)      | 13.3(2972)      | 9.7(802)         | 9.5(173)         | 11.2(150)        | <0.001  |                                                                                                                                                                                                                                                                            |
| Exercise intensity     |                 |                 |                  |                  |                  | <0.001  |                                                                                                                                                                                                                                                                            |
| Mild exercise,%        | 9.1(3081)       | 10.0(2251)      | 7.5(620)         | 5.8(106)         | 7.8(104)         |         |                                                                                                                                                                                                                                                                            |
| Moderate exercise,%    | 2.6(875)        | 2.8(618)        | 1.9(158)         | 3.4(61)          | 2.8(38)          |         |                                                                                                                                                                                                                                                                            |
| Severe exercise,%      | 0.4(141)        | 0.5(103)        | 0.3(24)          | 0.3(6)           | 0.6(8)           |         |                                                                                                                                                                                                                                                                            |
| Obesity(BMI>=28),%     | 15.1(5127)      | 15.7(3515)      | 13.3(1092)       | 15.9(289)        | 17.3(231)        | <0.001  | Microalbuminuria was defined as UACR>=30 mg/g, CKD was defined as eGFR<60 ml/min and hyperfiltration was defined as eGFR>=135 ml/min.                                                                                                                                      |
| HbA1c,%                | 5.9(5.6,6.2)    | 5.8(5.6,6.2)    | 5.9(5.6,6.3)     | 6.0(5.6,6.4)     | 6.0(5.6,6.5)     | <0.001  |                                                                                                                                                                                                                                                                            |
| SBP,mmHg               | 131.8±20.4      | 132.1±20.6      | 131.4±20.0       | 131.6±20.2       | 131.1±19.7       | 0.034   |                                                                                                                                                                                                                                                                            |
| DBP,mmHg               | 77.6±10.9       | 77.8±11.0       | 77.1±10.6        | 77.9±10.7        | 77.3±10.8        | <0.001  |                                                                                                                                                                                                                                                                            |
| Hypertension,%         | 40.5(13708)     | 39.7(8907)      | 41.8(3448)       | 43.1(783)        | 42.7(570)        | <0.001  |                                                                                                                                                                                                                                                                            |
| Menopause(Female),%    | 74.3(14270)     | 72.0(9121)      | 79.9(3888)       | 75.4(668)        | 76.5(593)        | <0.001  |                                                                                                                                                                                                                                                                            |
| CreaC,mmol/L           | 65.8(59.5,73.7) | 65.2(59.1,72.9) | 66.9(50.4,75.3)  | 66.9(60.1,77.8)  | 66.4(60.0,74.2)  | <0.001  | According to the quartile division, among which centre the subjects belonged, the UACR data were divided into the under 25% group, the 25%-50% group, the 50%-75% group, and the over 75% group. Higher UACR level was defined as subjects belonged to the over 75% group. |
| Triglycerides,mmol/L   | 1.36(0.97,1.97) | 1.32(0.95,1.92) | 1.45(1.03,2.06)  | 1.43(1.03,2.08)  | 1.49(1.04,2.10)  | <0.001  |                                                                                                                                                                                                                                                                            |
| Cholesterol,mmol/L     | 5.07±1.13       | 5.16±1.13       | 4.88±1.11        | 4.95±1.16        | 4.85±1.10        | <0.001  |                                                                                                                                                                                                                                                                            |
| HDL,mmol/L             | 1.32±0.34       | 1.34±0.34       | 1.26±0.33        | 1.26±0.34        | 1.25±0.33        | <0.001  |                                                                                                                                                                                                                                                                            |
| LDL,mmol/L             | 2.98±0.90       | 3.06±0.90       | 2.83±0.87        | 2.87±0.88        | 2.79±0.85        | <0.001  |                                                                                                                                                                                                                                                                            |
| GGT,mmol/L             | 21.0(15.0,32.0) | 21.0(15.0,32.0) | 20.0(15.0,31.8)  | 22.0(15.0,34.0)  | 21.0(15.0,33.0)  | <0.001  |                                                                                                                                                                                                                                                                            |
| AST,mmol/L             | 20.0(17.0,25.0) | 20.0(17.0,25.0) | 20.0(17.0,25.0)  | 20.0(17.0,25.0)  | 21.0(17.0,25.0)  | 0.862   |                                                                                                                                                                                                                                                                            |
| ALT,mmol/L             | 15.0(11.0,21.0) | 15.0(11.0,21.0) | 15.0(11.0,21.0)  | 14.0(11.0,20.0)  | 15.0(11.0,21.0)  | 0.715   |                                                                                                                                                                                                                                                                            |
| FBG,mmol/L             | 5.55(5.12,6.19) | 5.52(5.12,6.11) | 5.57(5.10,6.26)  | 5.65(5.20,6.40)  | 5.70(5.21,6.50)  | <0.001  |                                                                                                                                                                                                                                                                            |
| PBG,mmol/L             | 7.40(6.01,9.73) | 7.24(5.95,9.44) | 7.62(6.10,10.10) | 8.00(6.46,10.89) | 8.23(6.50,11.10) | <0.001  |                                                                                                                                                                                                                                                                            |
| Total sleep duration   | 8.1±1.2         | 7.8±1.1         | 8.5±1.0          | 9.2±1.1          | 9.8±1.2          | <0.001  |                                                                                                                                                                                                                                                                            |
| Microalbuminuria,%     | 13.3(4512)      | 11.3(2545)      | 17.6(1452)       | 15.0(273)        | 18.1(242)        | <0.001  |                                                                                                                                                                                                                                                                            |
| High UACR level,%      | 24.7(8357)      | 24.2(5434)      | 24.8(2045)       | 27.5(500)        | 28.3(378)        | <0.001  |                                                                                                                                                                                                                                                                            |
| CKD,%                  | 2.5(832)        | 2.3(510)        | 2.6(216)         | 3.6(65)          | 3.1(41)          | 0.001   |                                                                                                                                                                                                                                                                            |
| Hyperfiltration,%      | 2.5(860)        | 2.3(517)        | 2.7(226)         | 3.7(68)          | 3.7(49)          | <0.001  |                                                                                                                                                                                                                                                                            |
| UACR,mg/g              | 9.4(5.4,18.9)   | 8.4(5.1,16.1)   | 12.9(7.1,23.9)   | 10.4(5.7,20.5)   | 12.0(6.3,24.8)   | <0.001  |                                                                                                                                                                                                                                                                            |
| eGFR(ml/(min*1.73m2))  | 93.9±19.1       | 94.3±18.5       | 94.3±18.6        | 93.8±21.2        | 93.8±20.2        | <0.001  |                                                                                                                                                                                                                                                                            |

hypertension and diabetes. Multivariate logistic regressions were carried out before and after adjustment for possible confounding variables, such as age, sex, BMI, drinking and smoking habits, physic exercise, TG, CHOL, FBG, PBG, HbA1c, SBP, DBP, HDL, LDL, WC, HC. Results are shown at Table 3. Participants reporting short or long sleep duration had significant risks of microalbuminuria, high UACR level, hypertension and diabetes before adjustment in model 1, suggesting U-shaped relationship between sleep duration and health outcomes (Figure 1A). After adjusting for age, sex and BMI in model 2, the significant difference in hypertension outcome disappeared, suggesting differences in age, sex, and BMI between the sleep duration categories resulted in the higher risk for hypertension, and the relationship between short sleep duration and diabetes outcome had no statistical significance. After all confounding variables adjustment, only following several data were statistically significant. Compared with reference, fully adjusted ORs of >9 h/day for microalbuminuria and diabetes were 1.317 (1.200-1.446,  $p<0.001$ ) and 1.288 (1.191-1.393,  $p<0.001$ ); OR of (8, 9]h/day for microalbuminuria was 1.215 (1.123-1.315,  $p<0.001$ ); ORs of <6h/day and [6, 7)h/day for high UACR level were 1.207 (1.045-1.392,  $p=0.010$ ) and 1.126 (1.048-1.212,  $p=0.001$ ). In addition, the OR of <6h/day for microalbuminuria was 1.218 (0.967-1.534,  $p=0.094$ ), which was close to statistically significant. Therefore, these confounders had a strong interaction on the relationship between sleep duration and urinary protein, but the U-shaped trend relationship between sleep duration and urinary protein existed independent of these confounders (Figure 1C).

**Figure 1.** Association between sleep and risks for multiple health outcomes. (A&C) U-shaped association between total sleep duration and risks for multiple health outcomes. (B&D) Positive association between daytime napping and risks for multiple health outcomes. The bars in each group of data in the figure represent the total sleep duration of <6h, [6, 7]h, [7, 8]h, (8, 9]h and >9h, or represent the daytime napping of 0h, (0, 1]h, (1, 1.5]h and >1.5h successively. 1C and 1D were adjusted for age, sex, BMI, hip and waist circumference, drinking and smoking habits, physic exercise, triglycerides, cholesterol, HDL, LDL, GGT, blood glucose (except for diabetes) and blood pressure (except for hypertension)

Table 3. Risk for health outcomes according to total sleep duration and daytime napping.

|                        | microalbuminuria    |         | higher UACR level   |         | CKD                 |         | hyperfiltration     |         | hypertension        |         | diabetes            |         |
|------------------------|---------------------|---------|---------------------|---------|---------------------|---------|---------------------|---------|---------------------|---------|---------------------|---------|
|                        | OR                  | P value | OR                  | P value | OR                  | P value | OR                  | P value | OR                  | P value | OR                  | P value |
| Model 1                |                     |         |                     |         |                     |         |                     |         |                     |         |                     |         |
| Total sleep duration,h |                     |         |                     |         |                     |         |                     |         |                     |         |                     |         |
| (0, 6)                 | 1.335(1.070, 1.665) | 0.010   | 1.262(1.097, 1.452) | 0.001   | 1.222(0.747, 2.001) | 0.425   | 1.263(0.782, 2.042) | 0.339   | 1.183(1.010, 1.385) | 0.037   | 1.237(1.031, 1.484) | 0.022   |
| [6--7)                 | 1.101(0.976, 1.241) | 0.118   | 1.147(1.068, 1.231) | 0.000   | 0.912(0.686, 1.213) | 0.528   | 1.036(0.793, 1.352) | 0.798   | 1.006(0.928, 1.091) | 0.883   | 1.049(0.953, 1.155) | 0.329   |
| [7--8]                 | 1                   |         | 1                   |         | 1                   |         | 1                   |         | 1                   |         | 1                   |         |
| (8--9]                 | 1.308(1.212, 1.410) | 0.000   | 1.025(0.978, 1.074) | 0.296   | 1.188(1.003, 1.406) | 0.046   | 1.284(1.091, 1.511) | 0.003   | 1.059(1.004, 1.116) | 0.033   | 1.149(1.081, 1.223) | 0.000   |
| >9                     | 1.558(1.427, 1.702) | 0.000   | 1.108(1.047, 1.174) | 0.000   | 1.710(1.425, 2.053) | 0.000   | 1.522(1.262, 1.836) | 0.000   | 1.149(1.078, 1.226) | 0.000   | 1.464(1.361, 1.574) | 0.000   |
| Daytime napping,h      |                     |         |                     |         |                     |         |                     |         |                     |         |                     |         |
| 0                      | 1                   |         | 1                   |         | 1                   |         | 1                   |         | 1                   |         | 1                   |         |
| (0, 1]                 | 1.674(1.560, 1.795) | 0.000   | 1.019(0.974, 1.067) | 0.398   | 1.158(0.986, 1.361) | 0.074   | 1.197(1.021, 1.402) | 0.026   | 1.095(1.040, 1.152) | 0.001   | 1.294(1.220, 1.373) | 0.000   |
| (1, 1.5]               | 1.383(1.209, 1.584) | 0.000   | 1.120(1.028, 1.220) | 0.009   | 1.597(1.228, 2.076) | 0.000   | 1.650(1.275, 2.134) | 0.000   | 1.152(1.046, 1.269) | 0.004   | 1.621(1.458, 1.801) | 0.000   |
| >1.5                   | 1.731(1.497, 2.001) | 0.000   | 1.113(1.008, 1.229) | 0.034   | 1.362(0.986, 1.882) | 0.061   | 1.616(1.199, 2.177) | 0.002   | 1.132(1.012, 1.266) | 0.030   | 1.814(1.610, 2.044) | 0.000   |
| Model 2                |                     |         |                     |         |                     |         |                     |         |                     |         |                     |         |
| Total sleep duration,h |                     |         |                     |         |                     |         |                     |         |                     |         |                     |         |
| (0, 6)                 | 1.251(1.000, 1.565) | 0.050   | 1.212(1.051, 1.395) | 0.008   | 1.065(0.645, 1.759) | 0.806   | 1.346(0.829, 2.184) | 0.229   | 1.058(0.892, 1.255) | 0.517   | 1.159(0.961, 1.398) | 0.122   |
| [6--7)                 | 1.083(0.959, 1.223) | 0.198   | 1.129(1.050, 1.212) | 0.001   | 0.887(0.665, 1.184) | 0.416   | 1.043(0.797, 1.365) | 0.758   | 0.961(0.880, 1.049) | 0.369   | 1.029(0.932, 1.136) | 0.570   |
| [7--8]                 | 1                   |         | 1                   |         | 1                   |         | 1                   |         | 1                   |         | 1                   |         |
| (8--9]                 | 1.264(1.171, 1.365) | 0.000   | 1.002(0.957, 1.050) | 0.927   | 1.031(0.868, 1.224) | 0.731   | 1.324(1.123, 1.561) | 0.001   | 1.000(0.944, 1.058) | 0.987   | 1.104(1.036, 1.177) | 0.002   |
| >9                     | 1.442(1.318, 1.578) | 0.000   | 1.064(1.004, 1.126) | 0.035   | 1.273(1.054, 1.538) | 0.012   | 1.636(1.354, 1.977) | 0.000   | 1.005(0.937, 1.079) | 0.881   | 1.341(1.244, 1.446) | 0.000   |
| Daytime napping,h      |                     |         |                     |         |                     |         |                     |         |                     |         |                     |         |
| 0                      | 1                   |         | 1                   |         | 1                   |         | 1                   |         | 1                   |         | 1                   |         |
| (0, 1]                 | 1.561(1.453, 1.677) | 0.000   | 0.973(0.930, 1.019) | 0.244   | 0.887(0.752, 1.047) | 0.157   | 1.304(1.110, 1.530) | 0.001   | 0.948(0.896, 1.003) | 0.064   | 1.180(1.110, 1.255) | 0.000   |
| (1, 1.5]               | 1.307(1.140, 1.499) | 0.000   | 1.112(1.020, 1.212) | 0.016   | 1.295(0.990, 1.693) | 0.059   | 1.731(1.333, 2.247) | 0.000   | 0.954(0.858, 1.060) | 0.379   | 1.427(1.279, 1.592) | 0.000   |
| >1.5                   | 1.595(1.376, 1.849) | 0.000   | 1.053(0.954, 1.164) | 0.305   | 1.055(0.759, 1.468) | 0.749   | 1.761(1.302, 2.382) | 0.000   | 0.911(0.806, 1.029) | 0.132   | 1.619(1.431, 1.831) | 0.000   |
| Model 3                |                     |         |                     |         |                     |         |                     |         |                     |         |                     |         |
| Total sleep duration,h |                     |         |                     |         |                     |         |                     |         |                     |         |                     |         |
| (0, 6)                 | 1.218(0.967, 1.534) | 0.094   | 1.207(1.045, 1.392) | 0.010   | 1.100(0.663, 1.824) | 0.713   | 1.314(0.763, 2.261) | 0.325   | 1.014(0.851, 1.210) | 0.873   | 1.171(0.965, 1.421) | 0.110   |
| [6--7)                 | 1.088(0.960, 1.233) | 0.188   | 1.126(1.048, 1.212) | 0.001   | 0.934(0.699, 1.247) | 0.642   | 1.064(0.789, 1.435) | 0.683   | 0.950(0.868, 1.040) | 0.270   | 1.042(0.940, 1.154) | 0.436   |
| [7--8]                 | 1                   |         | 1                   |         | 1                   |         | 1                   |         | 1                   |         | 1                   |         |
| (8--9]                 | 1.215(1.123, 1.315) | 0.000   | 0.990(0.945, 1.039) | 0.688   | 1.030(0.866, 1.226) | 0.736   | 1.191(0.987, 1.438) | 0.068   | 0.974(0.918, 1.033) | 0.376   | 1.065(0.997, 1.138) | 0.060   |
| >9                     | 1.317(1.200, 1.446) | 0.000   | 1.030(0.971, 1.092) | 0.322   | 1.216(1.002, 1.477) | 0.047   | 1.395(1.121, 1.736) | 0.003   | 0.974(0.906, 1.048) | 0.480   | 1.288(1.191, 1.393) | 0.000   |
| Daytime napping,h      |                     |         |                     |         |                     |         |                     |         |                     |         |                     |         |
| 0                      | 1                   |         | 1                   |         | 1                   |         | 1                   |         | 1                   |         | 1                   |         |
| (0, 1]                 | 1.477(1.370, 1.591) | 0.000   | 0.973(0.930, 1.020) | 0.267   | 0.847(0.715, 1.003) | 0.054   | 0.867(0.721, 1.041) | 0.126   | 0.966(0.911, 1.024) | 0.241   | 1.150(1.079, 1.226) | 0.000   |
| (1, 1.5]               | 1.217(1.056, 1.403) | 0.007   | 1.079(0.988, 1.179) | 0.091   | 1.229(0.933, 1.619) | 0.143   | 1.265(0.933, 1.716) | 0.130   | 0.954(0.856, 1.064) | 0.401   | 1.434(1.279, 1.608) | 0.000   |
| >1.5                   | 1.447(1.242, 1.687) | 0.000   | 1.035(0.934, 1.145) | 0.517   | 0.976(0.696, 1.367) | 0.886   | 1.188(0.837, 1.687) | 0.336   | 0.890(0.785, 1.009) | 0.890   | 1.623(1.427, 1.845) | 0.000   |

Model 1 was unadjusted. Model 2 was adjusted for age, sex and BMI. Model 3 was adjusted for covariates in model 2 plus Hip and waist circumference, drinking and smoking habits, physic exercise, triglycerides, cholesterol, HDL, LDL, GGT, blood glucose (except for diabetes) and blood pressure (except for hypertension).

According to the daytime napping categories, we found daytime napping duration is a risk factor for microalbuminuria and diabetes independent of confounders. Compared to subjects did not nap, the ORs of (0, 1]h/day, (1, 1.5]h/day and >1.5h/day for microalbuminuria were 1.477 (1.370-1.591,  $p<0.001$ ), 1.217 (1.056, 1.403,  $p=0.007$ ) and 1.447 (1.242, 1.687,  $p<0.001$ ), for diabetes were 1.150(1.079, 1.226,  $p<0.001$ ), 1.434(1.279, 1.608,  $p<0.001$ ) and 1.623(1.427, 1.845,  $p<0.001$ ) after fully adjustment (Figure 1B, 1D).

To further investigate relationship between total or daytime sleep duration and eGFR, CKD and hyperfiltration, we divided participants into  $eGFR \geq 90$  ml/min group and  $eGFR < 90$  ml/min group. As we all known, in the progression of CKD, healthy individuals tended to have glomerular hyperfiltration initially, followed by increased risk for renal injury, leading to decrease in filtration rate and accelerating development of CKD. Thus we speculate eGFR level should be positively associated with inappropriate sleep duration among subjects with normal eGFR, while negatively associated with inappropriate sleep duration among subjects with lower eGFR. The results confirmed our conjecture. eGFR value was U-shaped associated with sleep duration among normal eGFR group (Figure 2A), and N-shaped associated with sleep duration among lower eGFR group (Figure 2B), suggesting both short and long sleep duration contributes to the progression of kidney function decline, which was consistent to the urinary protein-sleep duration relationship. Multivariate logistic regressions were carried out to examine the results, as it shown at Table 4, after fully

**Figure 2.** Association between sleep and eGFR. (A) Association between mean eGFR values and total sleep duration among subjects with  $<90$  ml/min and  $\geq 90$  ml/min eGFR. (B) Association between mean eGFR values and daytime napping among subjects with  $<90$  ml/min and  $\geq 90$  ml/min eGFR. (C&D) Risks for hyperfiltration among subjects with  $\geq 90$  ml/min eGFR, and risks for CKD among subjects with  $<90$  ml/min eGFR, according to total sleep duration or daytime napping. Adjusted covariates include age, sex, BMI, hip and waist circumference, drinking and smoking habits, physic exercise, triglycerides, cholesterol, HDL, LDL, GGT, blood glucose and blood pressure. CKD was defined as  $eGFR < 60$  ml/min and hyperfiltration was defined as  $eGFR \geq 135$  ml/min.

Table 4. Relationships between total sleep duration, daytime napping and eGFR.

|                        | CKD risk for subjects with eGFR<90 |         | Hyperfiltration risk for subjects with eGFR>=90 |         |
|------------------------|------------------------------------|---------|-------------------------------------------------|---------|
|                        | OR for CKD                         | P value | OR for hyperfiltration                          | P value |
| <b>Model 1</b>         |                                    |         |                                                 |         |
| Total sleep duration,h |                                    |         |                                                 |         |
| (0, 6)                 | 1.188(0.720, 1.963)                | 0.500   | 1.302(0.802, 2.116)                             | 0.286   |
| [6--7)                 | 0.910(0.681, 1.214)                | 0.520   | 1.036(0.792, 1.357)                             | 0.794   |
| [7--8]                 |                                    | 1       |                                                 | 1       |
| (8--9]                 | 1.152(0.971, 1.368)                | 0.105   | 1.325(1.123, 1.562)                             | 0.001   |
| >9                     | 1.549(1.286, 1.866)                | 0.000   | 1.689(1.397, 2.042)                             | 0.000   |
| Daytime napping,h      |                                    |         |                                                 |         |
| 0                      |                                    | 1       |                                                 | 1       |
| (0, 1]                 | 1.029(0.873, 1.212)                | 0.736   | 1.324(1.128, 1.554)                             | 0.001   |
| (1, 1.5]               | 1.481(1.132, 1.937)                | 0.004   | 1.794(1.381, 2.330)                             | 0.000   |
| >1.5                   | 1.294(0.931, 1.800)                | 0.125   | 1.712(1.265, 2.317)                             | 0.000   |
| <b>Model 2</b>         |                                    |         |                                                 |         |
| Total sleep duration,h |                                    |         |                                                 |         |
| (0, 6)                 | 1.053(0.633, 1.752)                | 0.843   | 1.336(0.820, 2.176)                             | 0.245   |
| [6--7)                 | 0.863(0.644, 1.156)                | 0.322   | 1.037(0.791, 1.360)                             | 0.791   |
| [7--8]                 |                                    | 1       |                                                 | 1       |
| (8--9]                 | 1.006(0.844, 1.198)                | 0.950   | 1.326(1.123, 1.565)                             | 0.001   |
| >9                     | 1.208(0.997, 1.464)                | 0.053   | 1.688(1.394, 2.044)                             | 0.000   |
| Daytime napping,h      |                                    |         |                                                 |         |
| 0                      |                                    |         |                                                 | 1       |
| (0, 1]                 | 0.860(0.727, 1.017)                | 0.077   | 1.345(1.144, 1.581)                             | 0.000   |
| (1, 1.5]               | 1.212(0.921, 1.594)                | 0.170   | 1.793(1.377, 2.334)                             | 0.000   |
| >1.5                   | 1.064(0.761, 1.488)                | 0.718   | 1.736(1.279, 2.357)                             | 0.000   |
| <b>Model 3</b>         |                                    |         |                                                 |         |
| Total sleep duration,h |                                    |         |                                                 |         |
| (0, 6)                 | 1.062(0.635, 1.777)                | 0.818   | 1.261(0.729, 2.179)                             | 0.407   |
| [6--7)                 | 0.906(0.676, 1.216)                | 0.512   | 1.076(0.797, 1.453)                             | 0.633   |
| [7--8]                 |                                    | 1       |                                                 | 1       |
| (8--9]                 | 1.005(0.842, 1.200)                | 0.957   | 1.168(0.966, 1.411)                             | 0.109   |
| >9                     | 1.150(0.945, 1.401)                | 0.163   | 1.400(1.123, 1.745)                             | 0.003   |
| Daytime napping,h      |                                    |         |                                                 |         |
| 0                      |                                    | 1       |                                                 | 1       |
| (0, 1]                 | 0.813(0.685, 0.965)                | 0.018   | 0.874(0.726, 1.051)                             | 0.153   |
| (1, 1.5]               | 1.140(0.860, 1.510)                | 0.363   | 1.285(0.943, 1.750)                             | 0.112   |
| >1.5                   | 0.955(0.678, 1.347)                | 0.795   | 1.191(0.836, 1.699)                             | 0.333   |

Model 1 was unadjusted. Model 2 was adjusted for age, sex and BMI. Model 3 was adjusted for covariates in model 2 plus Hip and waist circumference, drinking and smoking habits, phisic exercise, triglycerides, cholesterol, HDL, LDL, GGT, blood glucose and blood pressure.



124 adjustment, OR of >9h/day sleep for hyperfiltration was 1.400 (1.123-1.745,  
125 p=0.003) among eGFR $\geq$ 90 group. The U-shaped trend relationships between sleep  
126 duration and hyperfiltration among normal eGFR subjects or CKD among lower eGFR  
127 subjects exist (Figure 2C), though the statistical significance not ideal. It could be  
128 explained by few of our participants had eGFR<90 ml/min.

129 We noticed that daytime napping has a positive effect on the risk for hyperfiltration  
130 among eGFR $\geq$ 90 ml/min group in model 1 and model 2 (Table 4, Figure 2D).  
131 However, after fully adjustment, the statistical significance disappear, suggesting  
132 daytime napping affects the occurrence of hyperfiltration by influencing confounding  
133 factors such as blood glucose, BMI and blood lipid. It shall be supported by our  
134 previous finding that napping significantly increased the risk of diabetes (Table 3).

135 Actually, total sleep duration and daytime napping duration have an interaction on  
136 the risk of health outcomes as well. Subjects who sleep for a short time usually do not  
137 nap while those who sleep for a long time often have napping habit. Therefore, we  
138 conducted a joint analysis to investigate the interaction. We divided participants into  
139 20 subgroups according to their total sleep duration and daytime napping. Following  
140 five groups were excluded from the reanalysis because there were fewer than 100  
141 people: total sleep duration<6h&daytime napping between 0 and 1h; total sleep  
142 duration<6h&daytime napping between 1 and 1.5h; total sleep duration<6h&daytime  
143 napping>1.5h; total sleep duration between 6 and 7h&daytime napping between 1 and  
144 1.5h; total sleep duration between 6 and 7h&daytime napping>1.5h. A multivariate  
145 logistic regression after fully adjustment was carried out and result is shown in Figure

146 3, several results were notable. First, subjects with [7, 8]h total sleep duration and did  
147 not had a napping habit have the lowest risk for microalbuminuria. Second, The U-  
148 shaped relationship of risk for microalbuminuria and sleep duration was significant in  
149 the non-napping group, and the ORs of almost all these groups reached the statistically  
150 significant level (P=0.017, 0.081, 0.003, 0.000 respectively). This result not only  
151 indicated the U-shaped curve relationship more convincing, but also explained the  
152 reason why the statistical significance of short sleep duration groups was poor in our  
153 previous logistic regression analysis. It was because the subjects with short total sleep  
154 duration often do not have napping habit, and napping is also a risk factor for  
155 microalbuminuria, which prevent them from having a significant higher risk for  
156 microalbuminuria compared to the reference. Third, subjects with [6, 7]h total sleep  
157 duration and (0, 1]h daytime napping had the highest risk for microalbuminuria  
158 (OR=1.959, P<0.001). This was the group with the shortest total sleep duration and the  
159 longest napping that we included in the analysis ( groups with shorter total sleep  
160 duration and longer napping were excluded for small sample size, and the P values of  
161 these groups were poor. ), suggesting a lack of nighttime sleep can be dangerous for  
162 people who are already short on total sleep duration, and daytime napping is not enough  
163 to make up for the loss of sleep at night, which is consistent to conjecture of Miao et  
164 al<sup>28</sup>. Fourth, subjects with the longest total sleep duration and longest napping duration  
165 had the second high risk for albuminuria (OR=1.625, P<0.001), suggesting longer  
166 napping duration will further aggravate the risk of extremely long total sleep duration  
167 for microalbuminuria.

168

169 **Figure 3.** Joint analysis on total sleep duration and daytime napping in relation to the  
170 risk for microalbuminuria. Multivariate ORs for microalbuminuria were adjusted for  
171 age, sex, BMI, hip and waist circumference, drinking and smoking habits, physic  
172 exercise, triglycerides, cholesterol, HDL, LDL, GGT, blood glucose and blood pressure.  
173 Asterisk denotes result statistically different from [7, 8] hours of sleep duration per day  
174 with out daytime napping.

175

176 At last, we investigated the interactions of several confounders, which was  
177 commonly considered to be the main risk factor for microalbuminuria, including blood  
178 pressure, blood glucose and BMI, the results are shown at Table 5. We found long sleep  
179 duration is a statistically significant independent risk factor for microalbuminuria  
180 among subjects with  $>100$  mmHg SBP and  $<90$  mmHg DBP, but not among subjects  
181 with  $\leq 100$  mmHg SBP or  $\geq 90$  mmHg DBP. This may be due to the fact that blood  
182 pressure is the main factor affecting urinary protein, and the effect of sleep duration on  
183 urinary protein is insignificant for subjects with extremely poor or excellent blood  
184 pressure control. According to the results of different categories of glucose metabolism  
185 and BMI, both blood glucose and BMI had an interaction on the sleep-albuminuria  
186 association. For subjects with abnormal glucose metabolism or obesity problem, poor  
187 sleep habits were even worse for their health. This could be explained by our previous  
188 finding that extremely long sleep duration shall aggravate their obesity or diabetes,

189 followed by worse effects that long sleep duration bring to their health, which become  
 190 a vicious cycle.

## 191 Discussion

192 In this study, we identified associations between total sleep duration, daytime  
 193 napping, and the incidence of microalbuminuria, high UACR level, CKD and  
 194 hyperfiltration in a community middle-aged Chinese population. We found that total  
 195 sleep duration was U-shaped associated with the incidence of microalbuminuria and

Table 5. Risk for microalbuminuria according to total sleep duration among diverse subgroups.

|                              | Total sleep duration, h |              |        |              |              |
|------------------------------|-------------------------|--------------|--------|--------------|--------------|
|                              | (0, 6)                  | [6--7)       | [7--8] | [8--9]       | >9           |
| <b>SBP(mmHg)</b>             |                         |              |        |              |              |
| ≤100                         | 1.335(0.666)            | 0.844(0.700) | 1      | 1.198(0.499) | 0.912(0.787) |
| 100-140                      | 1.333(0.069)            | 1.089(0.327) | 1      | 1.212(0.000) | 1.277(0.000) |
| ≥140                         | 1.043(0.815)            | 1.098(0.333) | 1      | 1.184(0.006) | 1.352(0.000) |
| <b>DBP(mmHg)</b>             |                         |              |        |              |              |
| <90                          | 1.278(0.054)            | 1.114(0.125) | 1      | 1.217(0.000) | 1.340(0.000) |
| ≥90                          | 0.883(0.675)            | 0.949(0.724) | 1      | 1.135(0.180) | 1.063(0.848) |
| <b>glycometabolism</b>       |                         |              |        |              |              |
| NGT                          | 1.287(0.179)            | 1.088(0.402) | 1      | 1.180(0.009) | 1.189(0.028) |
| IFG/IGT                      | 1.192(0.425)            | 1.023(0.850) | 1      | 1.286(0.001) | 1.266(0.008) |
| DM                           | 1.319(0.176)            | 1.159(0.196) | 1      | 1.216(0.008) | 1.552(0.000) |
| <b>BMI(kg/m<sup>2</sup>)</b> |                         |              |        |              |              |
| <24                          | 0.846(0.436)            | 0.999(0.995) | 1      | 1.199(0.003) | 1.296(0.000) |
| 24-27                        | 1.227(0.333)            | 1.211(0.085) | 1      | 1.199(0.012) | 1.313(0.001) |
| 27-30                        | 1.915(0.008)            | 1.161(0.298) | 1      | 1.317(0.004) | 1.311(0.018) |
| ≥30                          | 1.337(0.370)            | 0.946(0.789) | 1      | 1.172(0.255) | 1.497(0.015) |

The model was adjusted for covariates in model 2 plus Hip and waist circumference, drinking and smoking habits, physic exercise, triglycerides, cholesterol, HDL, LDL, GGT, blood glucose and blood pressure. The data are presented as OR(P values).

196

197 the progression of kidney function decline, and daytime napping was associated with  
 198 the incidence of microalbuminuria positively. It was speculated extreme long sleep  
 199 duration could significantly aggravate the process of kidney damage, lead to  
 200 hyperfiltration first and then eGFR decline. Further joint analysis showed the  
 201 importance for the kidney function outcomes that people with short sleep duration  
 202 should ensure enough nighttime sleep and people with long sleep duration should limit

203 the daytime napping.

204 Several studies had investigated the association between sleep and kidney health  
205 outcome. Both short and long sleep duration were reported to be associated with  
206 decreased eGFR and the progression to ESRD among CKD<sup>12,21,32,33</sup> or hypertension<sup>18</sup>  
207 population, and to be associated with increased eGFR, hyperfiltration, inadequate  
208 hydration and the prevalence of CKD among community-based general  
209 population<sup>13,19,20,26-28</sup>. In our study, based on same general community population, we  
210 further demonstrated that inappropriate sleep duration had converse effects on eGFR in  
211 healthy or early-stage nephropathy population, which was consistent to previous studies.  
212 However, a US study of 4,238 participants from Nurses' Health Study (NHS) reported  
213 short sleep duration was prospectively associated with faster decline in kidney function  
214 among a healthy general population<sup>11</sup>. An explanation for that is NHS study was based  
215 on subjects whose jobs were nurse, which is often be high-intensity workers and shift  
216 workers. A Japanese study suggested that inappropriate sleep duration was more likely  
217 to affect kidney health and raise the risk of early stage kidney disease for shift workers<sup>34</sup>.  
218 Indeed, the participants of NHS study had a lower mean eGFR (88.3±25.0) than our  
219 participants (93.9±19.1), therefore, their results were more similar to those in the CKD  
220 population. A few studies selected albuminuria as a terminal outcome to evaluate how  
221 sleep affects kidney function. Both short and long sleep duration had been reported to  
222 be associated with UACR level among populations from Japan<sup>35</sup>, Korea<sup>36</sup> and US<sup>12</sup>,  
223 and daytime napping had been reported to be positively associated with albuminuria in  
224 Japan<sup>37</sup>, however, this relationship is racial-specific<sup>13</sup>, whether it exists among Chinese

225 population keeps unknown. This study confirmed the U-shaped relationship between  
226 sleep duration and albuminuria and the positive relationship between napping and  
227 albuminuria on the basis of the Chinese population. In addition, our samples were from  
228 8 different regions in China, including coastal and inland regions, developed and  
229 underdeveloped regions, with a wide geographical span, which is an ideal  
230 representation of the Chinese population. Finally, we investigated the interaction  
231 between total sleep time and napping, total sleep time and blood pressure, blood glucose  
232 and BMI, and provided a reference for individuals with diverse specific conditions to  
233 control appropriate sleep duration.

234       The correlation between sleep and kidney function can be explained in the  
235 following ways: First, both short and long sleep duration shall result in systemic  
236 inflammation, which may account mainly for the association with increased UACR  
237 levels. Long sleep duration is associated with subclinical inflammation and increased  
238 arterial stiffness<sup>38-41</sup>, while sleep curtailment increases the proinflammatory  
239 cytokines<sup>42</sup>, high-sensitivity C-reactive protein<sup>43</sup> and white blood cell<sup>44</sup> levels, which  
240 reflects systemic inflammation, causes glomerular endothelial dysfunction and  
241 consequently leads to albuminuria<sup>45,46</sup>. Second, changes in sympathetic nervous  
242 system influenced by higher or lower sleep duration may cause kidney function  
243 decline<sup>47</sup>. Sleep regulates the activity of hypothalamic pituitary adrenal (HPA) axis.  
244 Activity of HPA axis is reduced during sleep onset and early stages of sleep, while it  
245 is activated during latter stages of sleep, such as rapid eye movement (REM)  
246 stage<sup>41,48,49</sup>. Therefore, extreme short sleep may weaken the inhibitory effect of early

247 stage sleep on the HPA axis, while extreme long sleep may enhance the activation  
248 effect of REM stage on the HPA axis, thus keeping the activity of the HPA axis at  
249 higher level, which is adverse to the metabolic health. Third, sleep deprivation in  
250 humans reduces plasma renin, angiotensin and aldosterone levels, which is associated  
251 with increased urinary excretion of sodium and potassium<sup>50,51</sup>. In addition, the normal  
252 nocturnal dipping of blood pressure is attenuated. Related animal experiments had  
253 proved that sleep deprivation caused increased sympathetic nerve activity and reduced  
254 plasma angiotensin II levels<sup>52</sup>. Fifth, regarding the association between napping and  
255 microalbuminuria, changes in the circadian rhythms was speculated to contribute to  
256 the effect of sleep on kidney function. Animal models were constructed by mutating  
257 the circadian regulatory gene casein kinase-1 $\epsilon$ , related experiment showed animals'  
258 heterozygote for the mutation exhibit phase-advanced and shortened circadian  
259 rhythms and were shown to develop albuminuria, renal tubular atrophy and cardiac  
260 dysfunction<sup>53</sup>. This is supported by our findings that daytime napping could not  
261 compensate for lack of sleep at night when total sleep duration was equal, and by  
262 results reported by Sasaki et al<sup>34</sup>. That short sleep duration was more likely to affect  
263 kidney health in shift workers. Fifth, different distributions of sleep-disordered  
264 breathing (SDB)<sup>54-57</sup> and restless leg syndrome  
265 (RLS)<sup>46,47,55</sup> in several sleep duration groups may also be a reason, according to  
266 previous reports.

267 The major strength of our study is large sample of the general population from  
268 three areas of China, which made our results representative and statistically

269 significant, also provided the possibility for our subsequent subgroup analysis of  
270 interactions. REACTION study was an epidemiological investigation on tumors. In  
271 addition, detailed medical history and drug use history were collected during the  
272 questionnaire process. In this way, subjects with serious diseases and using  
273 ACEI/ARBs drugs could be excluded in the subsequent statistics to obtain more  
274 reliable results. However, current study also has several limitations. First, sleep  
275 duration was determined according to a self-reported questionnaire, as in many prior  
276 epidemiological studies and was not measured objectively; additionally, sleep quality  
277 cannot be evaluated, and prevalence of SDB or RLS could not acquire. Second, the  
278 cross-sectional study design prevents us from establishing a causal relationship  
279 between sleep and kidney function. Third, protein content intake the previous day and  
280 the interval between last meal and sleep were not available, which may affect UACR.  
281 Forth, UACR levels were determined by a single measurement, but detection methods  
282 of the 8 centres were different; hence, we set several outcomes, and the values of  
283 UACR were divided according to the quartile division in the centre to which the  
284 subject belonged, to estimate UACR level in logistic regression.

285 In summary, the goal of our study is demonstrating the relationship between sleep  
286 duration, daytime napping, UACR and eGFR in middle-aged apparently healthy  
287 Chinese population. We provided an explanation for the current epidemiological  
288 investigation into the controversial inconsistent results of the relationship between  
289 sleep duration and eGFR levels. Further cohort study should to be done to confirm our  
290 conclusions.



## 291 **Acknowledgments and Financial Disclosures**

292 The authors thank Jia Li, Yingfei Zhu, Yang Yu, Tianyu Xie from Nankai  
293 University and Haibin Wang from Medical School of Chinese PLA for Statistical  
294 knowledge consultation. No potential conflicts of interest relevant to this article were  
295 reported.

296 Present study was supported by Chinese Society of Endocrinology, the Key  
297 Laboratory for Endocrine and Metabolic Diseases of Ministry of Health  
298 (1994DP131044), the National Key New Drug Creation and Manufacturing Program  
299 of Ministry of Science and Technology (2012ZX09303006-001), the National High  
300 Technology Research and Development Program of China (863 Program,  
301 2011AA020107). National Science and Technology Major Project 288  
302 (2011ZX09307-001-08).

## 303 **Declaration of interest statement**

304 None declared

305

## 306 **Reference**

- 307 1. Xu Q, Song Y, Hollenbeck A, et al. Day napping and short night sleeping are  
308 associated with higher risk of diabetes in older adults. *Diabetes Care* 33(1):78-83.  
309 doi:10.2337/dc09-1143.
- 310 2. Ayas NT, White DP, Al-Delainy WK, et al. A prospective study of self-reported

- 311 sleep duration and incident diabetes in women. *Diabetes Care* 26(2):380-384.
- 312 3. Patel SR, Hayes AL, Blackwell T, et al. The association between sleep patterns and  
313 obesity in older adults. *Int J Obes* 38(9):1159-1164. doi:10.1038/ijo.2014.13.
- 314 4. Gangwisch JE, Heymsfield SB, Boden-Albala B, et al. Short sleep duration as a  
315 risk factor for hypertension: analyses of the first National Health and Nutrition  
316 Examination Survey. *Hypertension* 47(5):833-839.  
317 doi:10.1161/01.HYP.0000217362.34748.e0.
- 318 5. Wang Q, Xi B, Liu M, et al. Short sleep duration is associated with hypertension  
319 risk among adults: a systematic review and meta-analysis. *Hypertens Res*  
320 35(10):1012-1018. doi:10.1038/hr.2012.91.
- 321 6. Associations between sleep duration, daytime nap duration, and osteoporosis vary  
322 by sex, menopause, and sleep quality. *J Clin Endocrinol Metab* 99(8):2869-2877.  
323 doi:10.1210/jc.2013-3629.
- 324 7. Stone KL, Ewing SK, Ancoli-Israel S, et al. Self-reported sleep and nap habits and  
325 risk of mortality in a large cohort of older women. *J Am Geriatr Soc* 57(4):604-611.  
326 doi:10.1111/j.1532-5415.2008.02171.x.
- 327 8. Leng Y, Wainwright NW, Cappuccio FP, et al. Daytime napping and the risk of all-  
328 cause and cause-specific mortality: a 13-year follow-up of a British population. *Am J*  
329 *Epidemiol* 179(9):1115-1124. doi:10.1093/aje/kwu036.
- 330 9. Ge B, Guo X. Short and long sleep durations are both associated with increased risk

- 331 of stroke: a meta-analysis of observational studies. *Int J Stroke* 2015 Feb;10 (2): 177-  
332 84.
- 333 10. Association of sleep duration with mortality from cardiovascular disease and other  
334 causes for Japanese men and women: the JACC study. *Sleep*, 2009, 32:295-301.
- 335 11. Ciaran J, Gary C, John P, et al. Association of short sleep duration and rapid  
336 decline in renal function. *Kidney Int.* 2016 June ; 89(6): 1324–1330.
- 337 12. Ana C. Ricardo, Kristen Knutson, Jinsong Chen, et al. The Association of Sleep  
338 Duration and Quality with CKD Progression. *J Am Soc Nephrol.* 2017 Dec; 28(12):  
339 3708–3715.
- 340 13. Megan E. Petrov, Matthew P. Buman, Mark L. Unruh, et al. Association of sleep  
341 duration with kidney function and albuminuria: NHANES 2009-2012. *Sleep Health*  
342 2(2016)75-81.doi:10.1016/j.sleh.2015.12.003.
- 343 14. Junjuan Li, Zhe Huang, Jinhong Hou, et al. Sleep and CKD in Chinese Adults: A  
344 Cross-Sectional Study. *Clin J Am Soc Nephrol.* 2017 Jun 7; 12(6): 885–892.
- 345 15. Asher Y. Rosinger, Anne-Marie Chang, Orfeu Buxton, et al. Short sleep duration  
346 is associated with inadequate hydration: Cross-cultural evidence from US and Chinese  
347 adults. 2018 Nov 5.
- 348 16. Xi B, He D, Zhang M, et al. Short sleep duration predicts risk of metabolic  
349 syndrome: a systematic review and meta-analysis. *Sleep Med Rev* 2014; 18:293-297.
- 350 17. Anujoo K, Stronks K, Snijder MB et al. Relationship between short sleep duration

- 351 and cardiovascular risk factors in a multi-ethnic cohort-the helius study. *Sleep Med*  
352 2015; 16:1482-1488.
- 353 18. Xiaofan Guo, Shasha Yu, Zhao Li, et al. Self-reported sleep duration is associated  
354 with reduced glomerular filtration rate among adults with hypertension: a population-  
355 based study from rural northeast China. 2014 Nov 24.
- 356 19. Idoko Salifu, Fasika Tedla, Abhishek Pandey, et al. Sleep Duration and Chronic  
357 Kidney Disease: Analysis of the National Health Interview Survey. *Cardiorenal Med*  
358 2014; 4:210-216.
- 359 20. Hansol Choi, Hyeon Chang Kim, Joo Young Lee, et al. Sleep duration and  
360 chronic kidney disease: The Korean Genome and Epidemiology Study (KoGES)-  
361 Kangwha study. *Korean J Intern Med* 2017;32:323-334.
- 362 21. Kristen L, James Lash, Ana C, et al. Habitual sleep and kidney function in chronic  
363 kidney disease: the Chronic Renal Insufficiency Cohort study. *J Sleep Res.* (2018) 27,  
364 283-291.
- 365 22. Agarwal R, Light RP. Sleep and activity in chronic kidney disease: a longitudinal  
366 study. *Clin J Am Soc Nephrol* 2011;6:1258-1265.
- 367 23. Fujibayashi K, Fukuda H, Yokokawa H, et al. Associations between healthy  
368 lifestyle behaviors and proteinuria and the estimated glomerular filtration rate. *J*  
369 *Atheroscler Thromb* 2012; 19:932-940.
- 370 24. Nagai M, Hoshide S, Takahashi M, et al. Sleep duration, kidney function, and

- 371 their effects on cerebral small vessel disease in elderly hypertensive patients. *Am J*  
372 *Hypertens* 2015; 28:884-893. NUMBER 9
- 373 25. Sasaki S, Yoshioka E, Saijo Y, et al. Short sleep duration increases the risk of  
374 chronic kidney disease in shift worker. NUMBER 4
- 375 26. Megan E. Petrov, Yongin Kim, Diane S. Lauderdale, et al. Objective sleep, a  
376 novel risk factor for alterations in kidney function: the CARDIA Study. *Sleep Med.*  
377 2014 September ; 15(9): 1140–1146.
- 378 27. Miao Lin, Qing Su, Junping Wen, et al. Self-reported sleep duration and daytime  
379 napping are associated with renal hyperfiltration in general population. 24 January  
380 2017.
- 381 28. Chan-Won Kim, Yoosoo Chang, Eunju Sung, et al. Sleep duration and quality in  
382 relation to chronic kidney disease and glomerular hyperfiltration in healthy men and  
383 women. *PLoS ONE* 12(4): e0175298.
- 384 29. Okada R, Yasuda Y, Tsushita K, et al. Glomerular hyperfiltration in prediabetes  
385 and prehypertension. *Nephrol Dial Transplant.* 2012;27:1821-1825.
- 386 30. Palatini P. Glomerular hyperfiltration: a marker of early renal damage in  
387 prediabetes and prehypertension. *Nephrol Dial Transplant.* 2012;27:1708-1714.
- 388 31. Tomaszewski M, Charchar FJ, Maric C, et al. Glomerular hyperfiltratio: a new  
389 marker of metabolic risk. *Kidney Int.* 2007;71:816-821.
- 390 32. Ryohei Yamamoto, Maki Shinzawa, Yoshitaka Isaka, et al. Sleep Quality and

- 391 Sleep Duration with CKD are Associated with Progression to ESKD. CJASN. 2018.  
392 Nov 15.
- 393 33. Su-Ah Sung, Young Youl Hyun, Kyu Beck Lee, et al. Sleep Duration and Health-  
394 Related Quality of Life in Predialysis CKD. CJASN. 2018. May 3.
- 395 34. Sachiko Sasaki, Eiji Yoshioka, Yasuaki Saijo, et al. Short Sleep Duration  
396 Increases the Risk of Chronic Kidney Disease in Shift Workers. 2018. Dec 12.  
397 Volume 56.
- 398 35. Toshiaki O, Hiroki F, Masanori I, et al. Association between Sleep Duration and  
399 Urinary Albumin Excretion in Patient swith Type2 Diabetes: The Fukuoka Diabetes  
400 Registry. PLOS ONE 2013,e78968.
- 401 36. Ji Hee Yu, Kyungdo Han, Nam Hoon Kim, et al. U-shaped association between  
402 sleep duration  
403 and urinary albumin excretion in Korean adults: 2011-2014 Korea National Health  
404 and Nutrition Examination Survey. PLOS ONE 2018;  
405 <https://doi.org/10.1371/journal.pone.0192980>
- 406 37. Franziska J. Franke , Michael Arzt , Tanja Kroner, et al. Daytime napping and  
407 diabetes-associated kidney disease. Sleep Medicine 2018  
408 <https://doi.org/10.1016/j.sleep.2018.10.034> 1389-9457
- 409 38. Bash LD, Erlinger TP, Coresh J, Marsh-Manzi J, Folsom AR, Astor BC.  
410 Inflammation, hemostasis, and the risk of kidney function decline in the

- 411 Atherosclerosis Risk in Communities (ARIC) Study. *Am J Kidney Dis.* 2009;  
412 53:596±605. <https://doi.org/10.1053/j.ajkd.2008.10.044> PMID: 19110358
- 413 39. Kim CW, Chang Y, Zhao D, Cainzos-Achirica M, Ryu S, Jung HS, et al. Sleep  
414 Duration, Sleep Quality, and Markers of Subclinical Arterial Disease in Healthy Men  
415 and Women. *Arterioscler Thromb Vasc Biol.* 2015; 35:2238±2245.  
416 <https://doi.org/10.1161/ATVBAHA.115.306110> PMID: 26359509
- 417 40. Sedaghat S, Mattace-Raso FU, Hoorn EJ, Uitterlinden AG, Hofman A, Ikram  
418 MA, et al. Arterial Stiffness and Decline in Kidney Function. *Clin J Am Soc Nephrol.*  
419 2015; 10:2190±2197. <https://doi.org/10.2215/CJN.03000315> PMID: 26563380
- 420 41. Patel SR, Zhu X, Storfer-Isser A, Mehra R, Jenny NS, Tracy R, et al. Sleep  
421 duration and biomarkers of inflammation. *Sleep.* 2009; 32:200±204. PMID: 19238807
- 422 Spiegel K, Tasali E, Leproult R, Van Cauter E. Effects of poor and short sleep on  
423 glucose metabolism and obesity risk. *Nat Rev Endocrinol* 2009;5:253–61.
- 424 42. Vgontzas AN, Zoumakis E, Bixler EO, Lin HM, Follett H, et al. Adverse effects of  
425 modest sleep restriction on sleepiness, performance, and inflammatory cytokines. *J*  
426 *Clin Endocrinol Meta*, 2004. b89:2119–2126.
- 427 43. Meier-Ewert HK, Ridker PM, Rifai N, Regan MM, Price NJ, et al. Effect of sleep  
428 loss on C-reactive protein, an inflammatory marker of cardio vascular risk. *J Am Coll*  
429 *Cardiol*, 2004.43:678–683.
- 430 44. Dinges DF, Douglas SD, Zaugg L, Campbell DE, McMann JM, et al. Leukocytosis  
431 and natural killer cell function parallel neurobehavioral fatigue induced by 64 hours of

- 432 sleep deprivation. *J Clin Invest*,1994.93:1930–1939.
- 433 45. Arima S, Ito S. The mechanisms underlying altered vascular resistance of  
434 glomerular afferent and efferent arterioles in diabetic nephropathy. *Nephrol Dial*  
435 *Transplant*,2003.18:1966–1969.
- 436 46. Hall JE, Brands MW, Henegar JR. Mechanisms of hypertension and kidney  
437 disease in obesity. *Ann N Y Acad Sci*.1999.892:91–107
- 438 47. Musselman DL, Evans DL, Nemeroff CB. The relationship of depression to cardio  
439 vascular disease: epidemiology, biology and treatment. *Arch Gen Psychiatry*, 1998.  
440 55:580–592.
- 441 48. Meerlo P, Sgoifo A, Suchecki D. Restricted and disrupted sleep: effects on  
442 autonomic function, neuroendocrine stress systems and stress responsivity. *Sleep Med*  
443 *Rev* 2008;12:197–210.
- 444 49. Buckley TM, Schatzberg AF. On the interactions of the hypothalamic-pituitary-  
445 adrenal (HPA) axis and sleep: normal HPA axis activity and circadian rhythm,  
446 exemplary sleep disorders. *J Clin Endocrinol Metab* 2005;90:3106–14.
- 447 50. Charloux A, Gronfier C, Chapotot F, Ehrhart J, et al. Sleep deprivation blunts the  
448 night time increase in aldosterone release in humans. *J Sleep Res* 2001;10:27-33.
- 449 51. Kamperis K, Hagstroem S, Radvanska E, et al. Excess diuresis and natriuresis  
450 during acute sleep deprivation in healthy adults. *Am J Physiol Renal Physiol*  
451 2010;299:F404-411.



- 452 52. Perry JC, Bergamaschi CT, Campos RR, et al. Sympathetic and angiotensinergic  
453 responses mediated by paradoxical sleep loss in rats. *J Renin Angiotensin Aldosterone*  
454 *Syst* 2011;12:146-152.
- 455 53. Martino TA, Oudit GY, Herzenberg AM, et al. Circadian rhythm disorganization  
456 produces profound cardiovascular and renal disease in hamsters. *Am J Physiol Regul*  
457 *Integr Comp Physiol* 2008; 294:R1675–R1683.
- 458 54. Canales MT, Paudel ML, Taylor BC, Ishani A, Mehra R, et al. Sleep-disordered  
459 breathing and urinary albumin excretion in older men. *Sleep Breath*, 2011.15:137–144.
- 460 55. Patel SR, Malhotra A, Gottlieb DJ, White DP, Hu FB. Correlates of long sleep  
461 duration. *Sleep*, 2006. 29:881–889.
- 462 56. Merlino G, Fratticci L, Valente M, DelGiudice A, Noacco C, et al. Association of  
463 restless legs syndrome in type2 diabetes: a case-control study. *Sleep*, 2007.30:866–871.
- 464 57. Innes KE, Selfe TK, Agarwa IP. Restless legs syndrome and conditions associated  
465 with metabolic dysregulation, sympathoadrenal dysfunction, and cardiovascular  
466 disease risk: A systematic review. *Sleep Med Rev*, 2012. 16:309–339.

bioRxiv preprint doi: <https://doi.org/10.1101/586190>; this version posted March 21, 2019. The copyright holder for this preprint (which was not certified by peer review) is the author/funder, who has granted bioRxiv a license to display the preprint in perpetuity. It is made available under aCC-BY 4.0 International license.

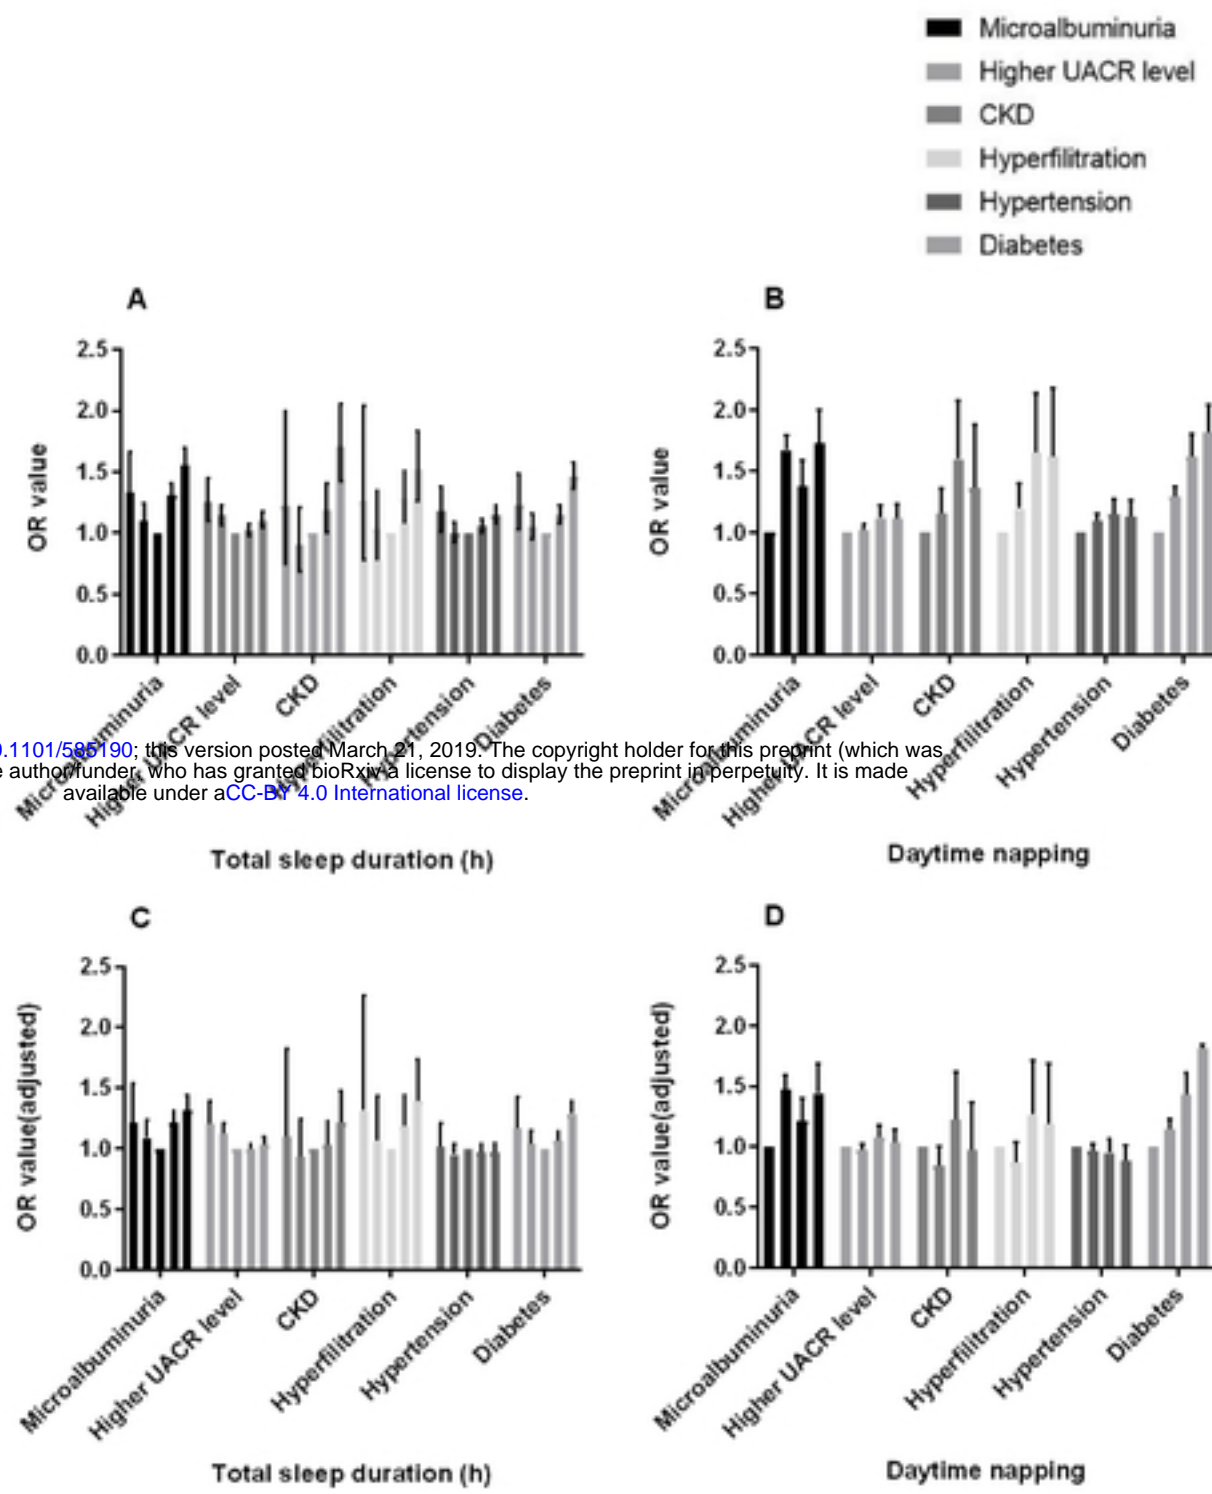

Figure 1. Association between sleep and risks for multiple health outcomes. (A&C) U-shaped association between total sleep duration and risks for multiple health outcomes. (B&D) Positive association between daytime napping and risks for multiple health outcomes. The bars in each group of data in the figure represent the total sleep duration of <6h, [6, 7]h, [7, 8]h, (8, 9]h and >9h, or represent the daytime napping of 0h, (0, 1]h, (1, 1.5]h and >1.5h successively. 1C and 1D were adjusted for age, sex, BMI, hip and waist circumference, drinking and smoking habits, physic exercise, triglycerides, cholesterol, HDL, LDL, GGT, blood glucose (except for diabetes) and blood pressure (except for hypertension).

bioRxiv preprint doi: <https://doi.org/10.1101/585190>; this version posted March 21, 2019. The copyright holder for this preprint (which was not certified by peer review) is the author/funder, who has granted bioRxiv a license to display the preprint in perpetuity. It is made available under aCC-BY 4.0 International license.

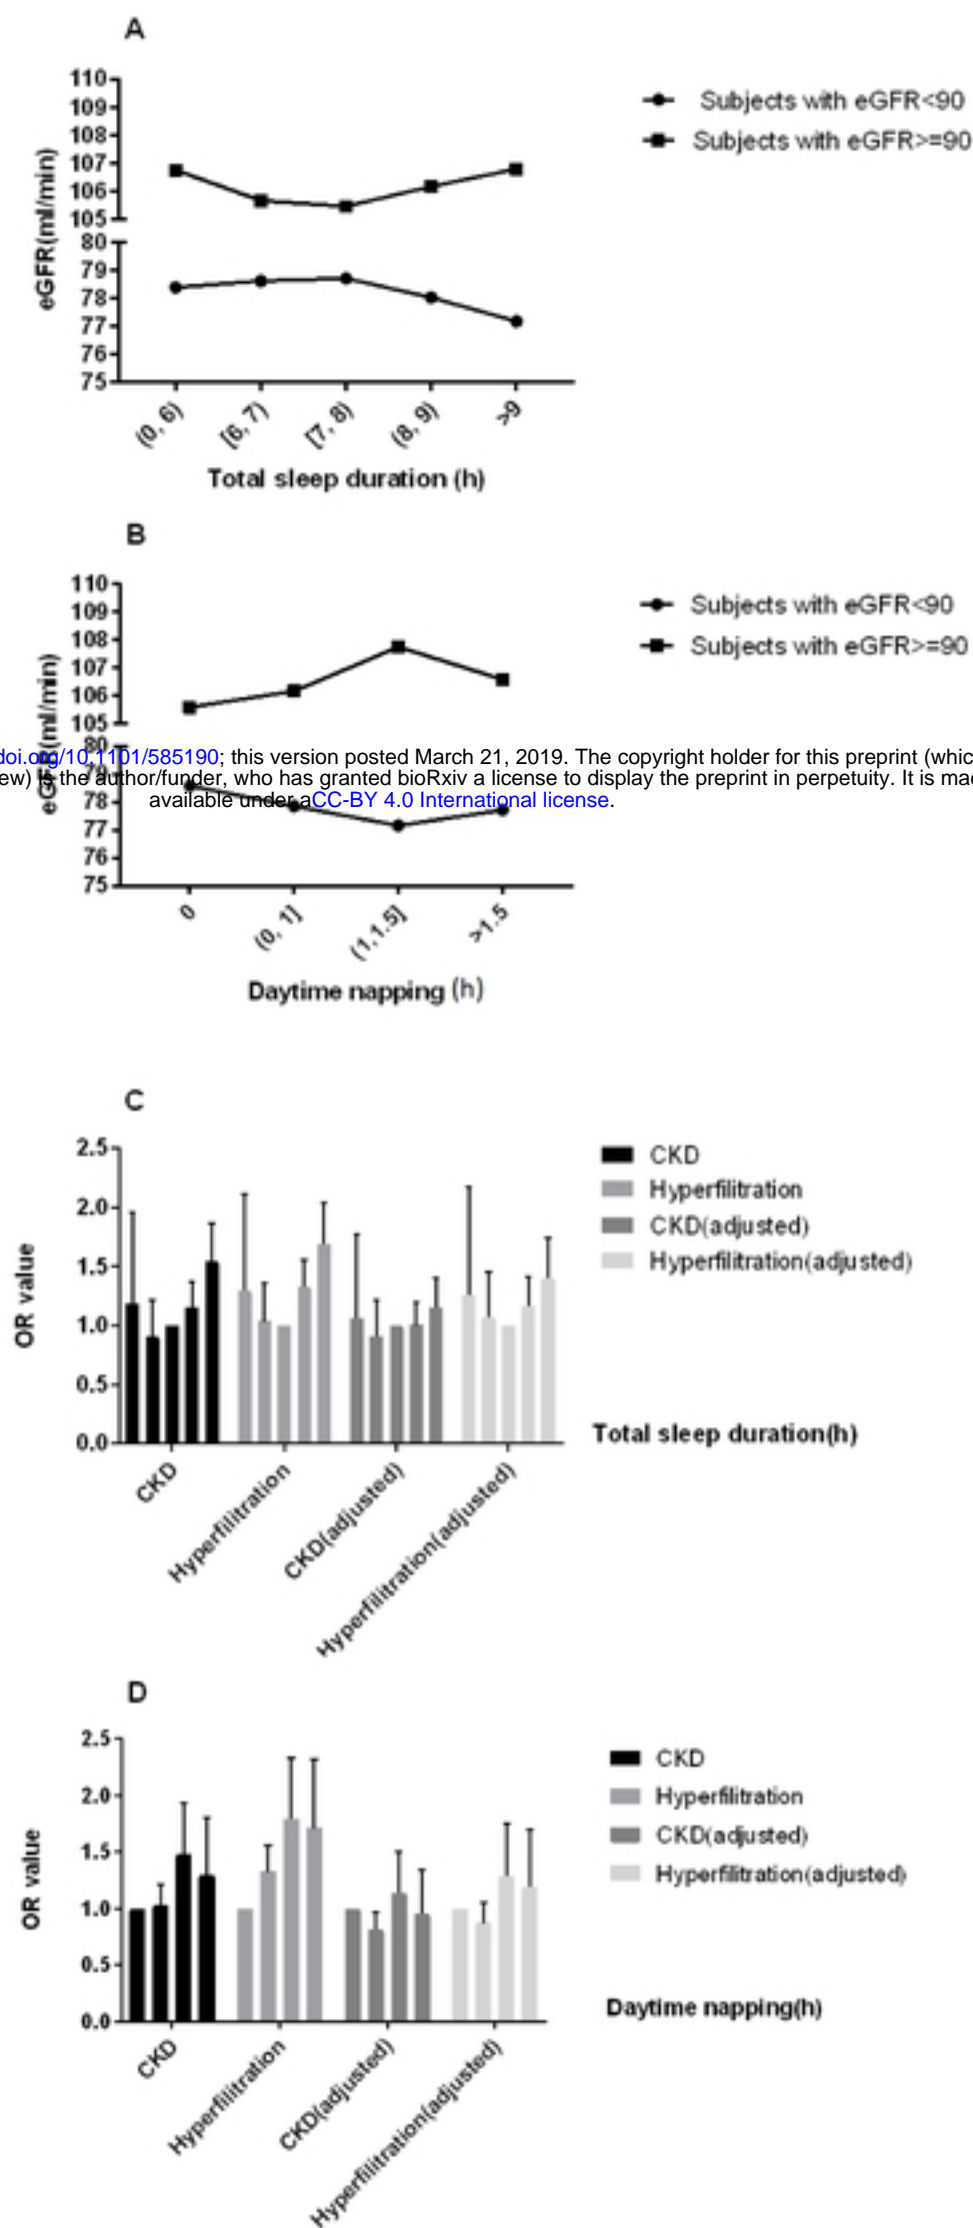

Figure 2. Association between sleep and eGFR. (A) Association between mean eGFR values and total sleep duration among subjects with <90 ml/min and ≥90ml/min eGFR. (B) Association between mean eGFR values and daytime napping among subjects with <90 ml/min and ≥90ml/min eGFR. (C&D) Risks for hyperfiltration among subjects with ≥90ml/min eGFR, and risks for CKD among subjects with <90ml/min eGFR, according to total sleep duration or daytime napping. Adjusted covariates include age, sex, BMI, hip and waist circumference, drinking and smoking habits, physic exercise, triglycerides, cholesterol, HDL, LDL, GGT, blood glucose and blood pressure. CKD was defined as eGFR<60 ml/min and hyperfiltration was defined as eGFR≥135 ml/min.

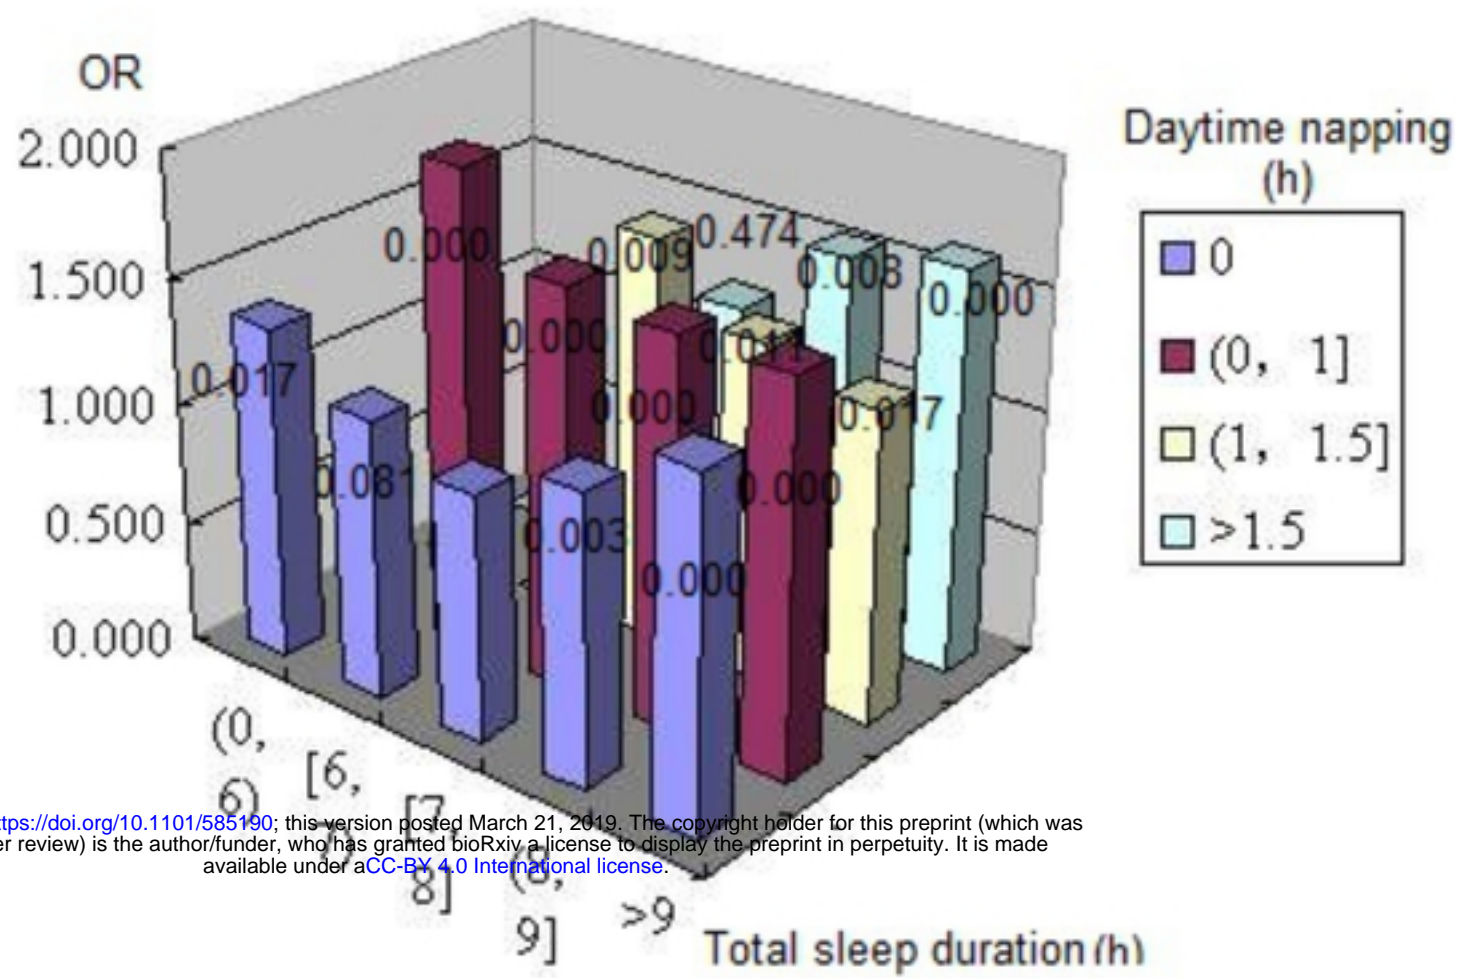

bioRxiv preprint doi: <https://doi.org/10.1101/585190>; this version posted March 21, 2019. The copyright holder for this preprint (which was not certified by peer review) is the author/funder, who has granted bioRxiv a license to display the preprint in perpetuity. It is made available under aCC-BY 4.0 International license.

Figure 3. Joint analysis on total sleep duration and daytime napping in relation to the risk for microalbuminuria. Multivariate ORs for microalbuminuria were adjusted for age, sex, BMI, hip and waist circumference, drinking and smoking habits, physic exercise, triglycerides, cholesterol, HDL, LDL, GGT, blood glucose and blood pressure. Asterisk denotes result statistically different from [7, 8] hours of sleep duration per day with out daytime napping.
